# Supplementary material
Source: publisher figshare collection journal article supplement (https://sage.figshare.com/ndownloader/files/13438787)
Supplement: Supplementary file 1 [file 13438787]

### 1. Department Demographics

|                           | 1-5                      | 6-10                     | 11-15                    | 16-20                    | >20                      |
|---------------------------|--------------------------|--------------------------|--------------------------|--------------------------|--------------------------|
| Number of Faculty Members | <input type="checkbox"/> |
| Number of Residents       | <input type="checkbox"/> |

### 2. Otolaryngology Department Faculty Demographics

|                                                                      | 0-20                     | 21-40                    | 41-60                    | 61-80                    | 100                      |
|----------------------------------------------------------------------|--------------------------|--------------------------|--------------------------|--------------------------|--------------------------|
| Percentage of faculty actively involved in research                  | <input type="checkbox"/> |
| Percentage of faculty receiving external grants                      | <input type="checkbox"/> |
| Percentage of faculty receiving private industry funding             | <input type="checkbox"/> |
| Percentage of faculty receiving national organization/society grants | <input type="checkbox"/> |
| Percentage of faculty receiving government funding (NIH, etc.)       | <input type="checkbox"/> |

### 3. Does your program have fellowships in otolaryngology?

- ☐ No
- ☐ 1
- ☐ 2-4
- ☐ 5
- ☐ >5

### 4. Please provide your opinion regarding research in your department:

|                                                              | Strongly Disagree        | Disagree                 | Neutral                  | Agree                    | Strongly Agree           |
|--------------------------------------------------------------|--------------------------|--------------------------|--------------------------|--------------------------|--------------------------|
| Department chair actively promotes resident research efforts | <input type="checkbox"/> |
| The department has faculty skilled in research               | <input type="checkbox"/> |
| Departmental research network is well developed              | <input type="checkbox"/> |
| Departmental research resources are adequate                 | <input type="checkbox"/> |
| Nonclinical time allotted to faculty is adequate             | <input type="checkbox"/> |

### 5. Does your department provide education in research for otolaryngology residents?

Yes - We have a structured research education program

- ☐ Yes - We offer research education, but do NOT have a structured program
- ☐ No - We do NOT offer specific research education

6. What is the duration (months) of the research rotation?

- ☐ 0  
☐ 1  
☐ 2  
☐ 3  
☐ 4  
☐ >4

7. Indicate which activities are included in your research program:

- ☐ Didactic sessions  
☐ Development of a hypothesis based research project  
☐ Basic science research experience (i.e laboratory based)  
☐ Development of scientific presentation skills  
☐ Development of scientific writing skills  
☐ Other (please specify)

8. Are the research rotation residents expected to do the following:

- ☐ Present at Journal Club discussions  
☐ Present at Departmental Educational meetings  
☐ Present at a National Meeting  
☐ Submit a manuscript to a peer reviewed journal

9. Does your department provide any of the following to facilitate resident research:

|                                                                        | Yes                      | No                       |
|------------------------------------------------------------------------|--------------------------|--------------------------|
| Financial support for <b>oral</b> presentations at national meetings   | <input type="checkbox"/> | <input type="checkbox"/> |
| Financial support for <b>poster</b> presentations at national meetings | <input type="checkbox"/> | <input type="checkbox"/> |
| Funds for resident research projects                                   | <input type="checkbox"/> | <input type="checkbox"/> |
| Research education curriculum                                          | <input type="checkbox"/> | <input type="checkbox"/> |
| Research coordinator                                                   | <input type="checkbox"/> | <input type="checkbox"/> |
| Research assistant                                                     | <input type="checkbox"/> | <input type="checkbox"/> |

10. Do faculty members have a research coordinator for the section/department?

- ☐ Yes - for the section/department
- ☐ Yes - Shared with other sections/department in the institution
- ☐ No - we never used a research coordinator
- ☐ No- we rarely used a research coordinator

11. What percentage of residents in your program published a manuscript in a peer-reviewed journal within the last 3 years?

- ☐ <20 ☐ 21-40 ☐ 41-60 ☐ 61-80 ☐ 81-100

12. What percentage of your graduating residents went into academic practice in the last 3 years?

- ☐ <20 ☐ 21-40 ☐ 41-60 ☐ 61-80 ☐ 81-100

13. Please rate the barriers to resident education in research in your department:

|                                          | Strongly Disagree        | Disagree                 | Neutral                  | Agree                    | Strongly Agree           |
|------------------------------------------|--------------------------|--------------------------|--------------------------|--------------------------|--------------------------|
| Lack of faculty support/mentorship       | <input type="checkbox"/> |
| Lack of resident interest in research    | <input type="checkbox"/> |
| Lack of funding                          | <input type="checkbox"/> |
| Time constraints due to residency duties | <input type="checkbox"/> |
| Lack of technical & personnel support    | <input type="checkbox"/> |
| Lack of structured curriculum            | <input type="checkbox"/> |
| Lack of statistical knowledge            | <input type="checkbox"/> |
| Lack of faculty non-clinical time        | <input type="checkbox"/> |

Other (please specify)

14. Please provide your opinion on resident research training:

|                                                         | Strongly Disagree        | Disagree                 | Neutral                  | Agree                    | Strongly Agree           |
|---------------------------------------------------------|--------------------------|--------------------------|--------------------------|--------------------------|--------------------------|
| Research is an integral component of residency training | <input type="checkbox"/> |
| Research should be MANDATORY during residency           | <input type="checkbox"/> |
| Research should be OPTIONAL during residency            | <input type="checkbox"/> |
| An organized curriculum would improve research training | <input type="checkbox"/> |
